# Supplementary material
Source: PubMed Central journal article supplement (PMC4528961)
Supplement: NIHMS711676-supplement-supplemental.pdf [file NIHMS711676-supplement-supplemental.pdf]

**Supporting information for:**

**Introduction of a New Critical P-Value Correction Method for Statistical Significance Analysis of Metabonomics Data**

Bo Wang,<sup>†</sup> Zhanquan Shi,<sup>‡</sup> Georg F. Weber,<sup>‡</sup> and Michael A. Kennedy<sup>†\*</sup>

**Figure S1.** Representative NMR spectrum of Group A breast cancer cell line hydrophilic extract.

**Figure S2.** Scatter plot of p value from combined t test with loadings from PLS-DA (C vs V). Red squares are significant buckets by BC and green triangles are significant by FDR

**Fig. S3** a) Scatter plot (A vs V) of p value from combined t test with loadings from PLS-DA; b) Scatter plot (A vs V) of p value from Welch's t test with loadings from PLS-DA.

A #1 w\_3\_1

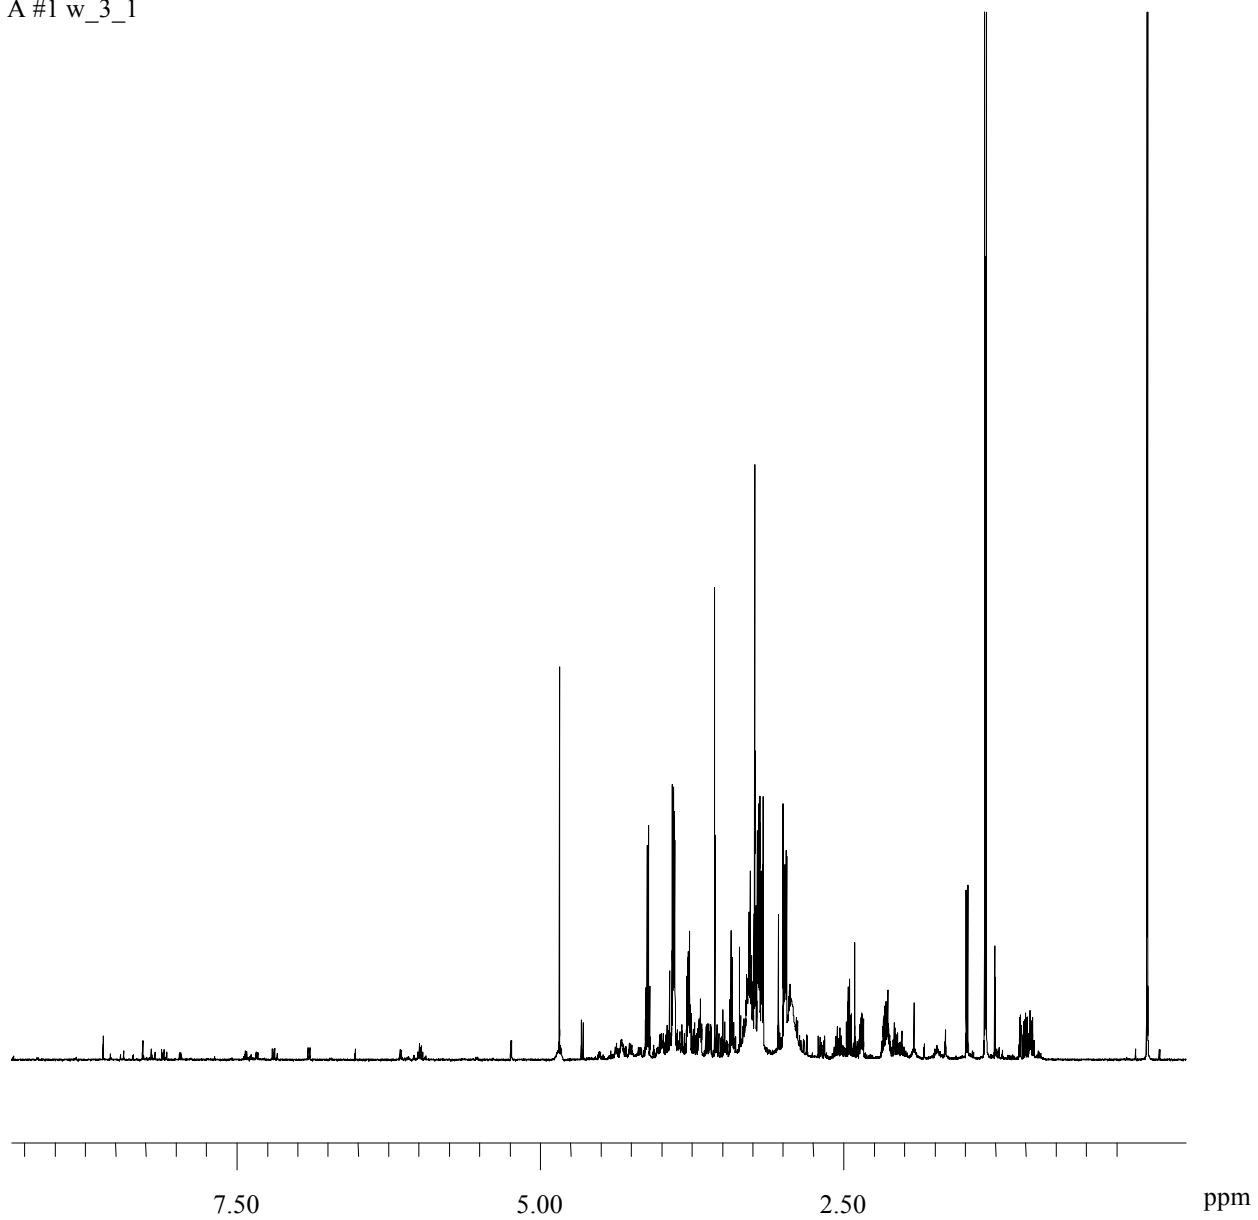

**Fig. S1** Representative NMR spectrum of Group A breast cancer cell line hydrophilic extract.

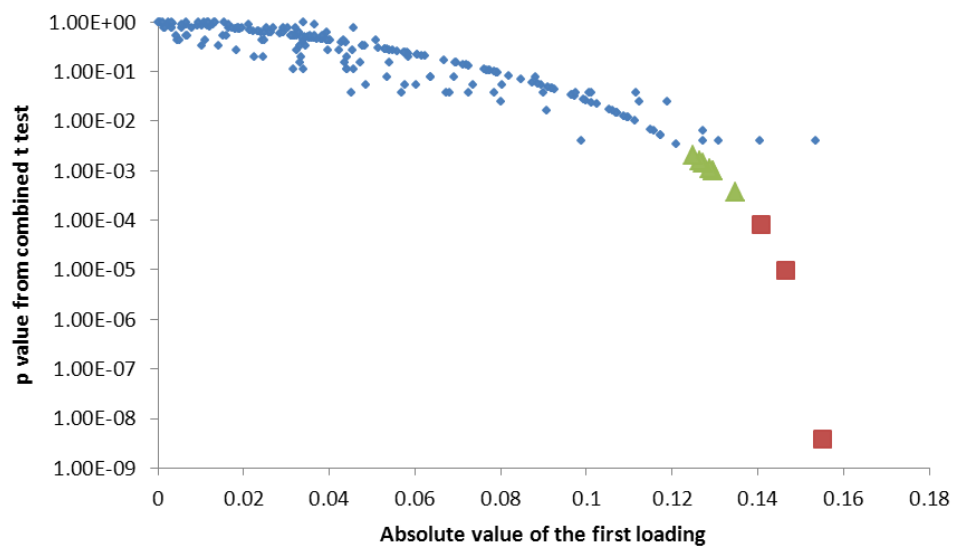

**Fig. S2** Scatter plot of p value from combined t test with loadings from PLS-DA (C vs V). Red squares are significant buckets by BC and green triangles are significant by FDR.

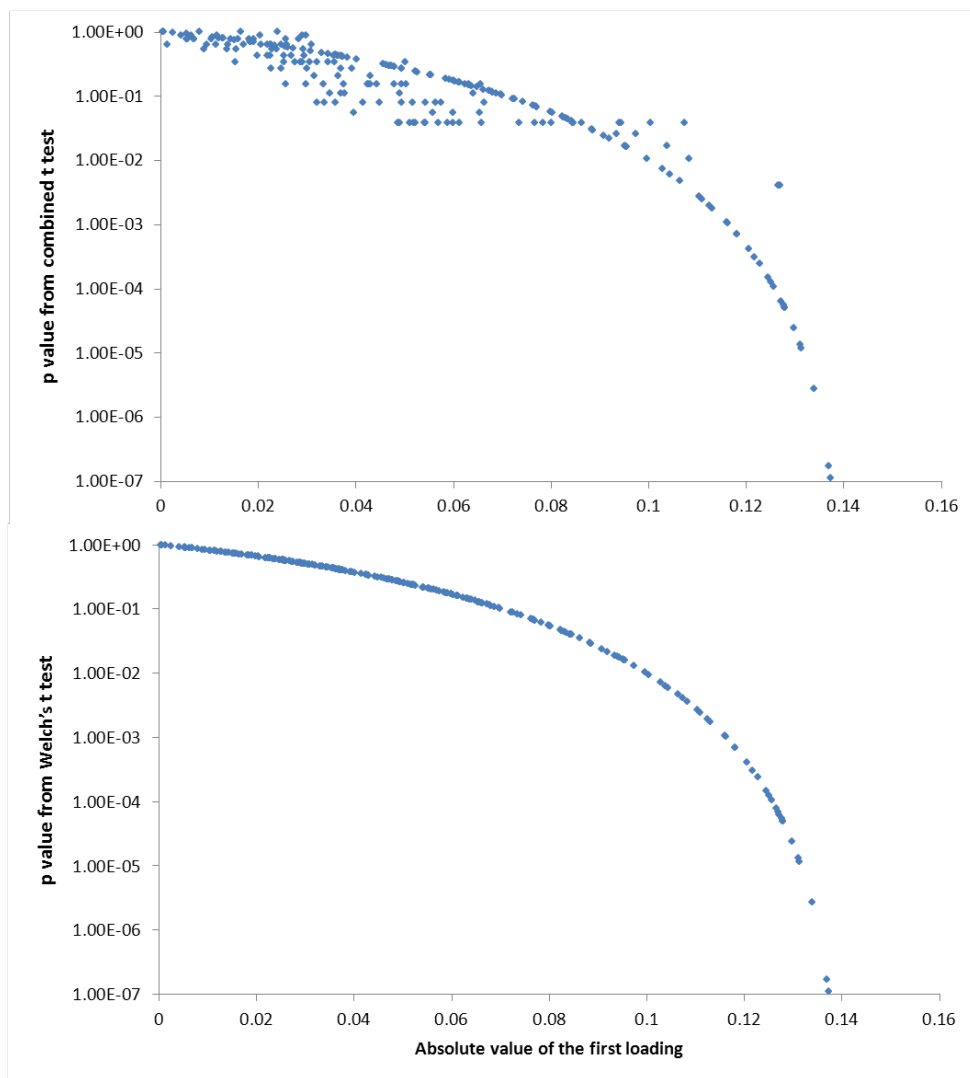

**Fig. S3** a) Scatter plot (A vs V) of p value from combined t test with loadings from PLS-DA; b) Scatter plot (A vs V) of p value from Welch's t test with loadings from PLS-DA.
